# Supplementary material for: Attention-deficit hyperactivity disorder symptoms and brain morphology: Examining confounding bias
Source: eLife. 2022 Nov 9;11:e78002. doi: 10.7554/eLife.78002 (PMC9708072; doi:10.7554/eLife.78002)
Supplement: Supplementary file 1. — (a) Overview of adjusted confounders for neuroimaging studies on attention-deficit/hyperactivity disorder (ADHD). Note. S = sensitivity; M = matched. (b) Descriptive statistics of the study population in the ABCD and Generation R Studies. aFor the ABCD Study, missing values were present for race/ethnicity (<0.1%), highest parental education (<0.1%), household income (8.9%), maternal age at birth (2.4%), smoking during pregnancy (<0.1%), cannabis use during pregnancy (<0.1%), and IQ (2.3%). bFor Generation R, missing values were present for ethnicity (<0.1%), maternal education (8.0%), household income (12.0%), smoking during pregnancy (11.1%), cannabis use during pregnancy (19.5%), IQ (12.4%), and aggression problems (<0.1%). [file elife-78002-supp1.docx]

**Supplementary File 1**

**Attention Deficit Hyperactivity Disorder Symptoms and Brain Morphology:**

**Examining Confounding Bias**

Lorenza Dall’Aglio1,2*; Hannah H. Kim3*; Sander Lamballais4*; Jeremy Labrecque5; Ryan L. Muetzel1†; Henning Tiemeier1,3†

1Department of Child and Adolescent Psychiatry, Erasmus MC University Medical Center Rotterdam-Sophia Children’s Hospital, Rotterdam, the Netherlands

2The Generation R Study Group, Erasmus MC University Medical Center Rotterdam, Rotterdam, the Netherlands

3Department of Social and Behavioral Sciences, Harvard T.H. Chan School of Public Health, Boston, USA

4Department of Clinical Genetics, Erasmus MC University Medical Center Rotterdam, Rotterdam, the Netherlands

5Department of Epidemiology, Erasmus MC University Medical Center Rotterdam, Rotterdam, the Netherlands

*Co-first author

†Co-last author

**Corresponding author:** Henning Tiemeier, MD Ph.D.; Department of Social and Behavioral Sciences, Harvard T.H. Chan School of Public Health, 677 Huntington Ave, Boston, 02115 MA, USA; [tiemeier@hsph.harvard.edu](mailto:tiemeier@hsph.harvard.edu)

| First Author | Year | DOI | Age | Sex | IQ | Other confounders |
| --- | --- | --- | --- | --- | --- | --- |
| Al-Amin | 2018 | <https://doi.org/10.1016/j.brainres.2018.02.007> | yes | yes | no | site, ICV |
| Vilgis | 2016 | <https://doi.org/10.1016/j.pscychresns.2016.06.008> | M | no | S | scan, ICV |
| Pineda | 2002 | [https://doi.org/10.1177/088307380201700202](https://doi.org/10.1177%2F088307380201700202) | M | M | no | weight, height, head circumference, encephalic index, SES, grade |
| Semrud-Clikeman | 2014 | [https://doi.org/10.1177/1087054714559642](https://doi.org/10.1177%2F1087054714559642) | no | no | no | total brain volume |
| Carmona | 2005 | <https://doi.org/10.1016/j.neulet.2005.07.020> | M | M | M | global activity, laterality |
| Carmona | 2009 | <https://doi.org/10.1016/j.biopsych.2009.05.013> | M | M | no | handedness |
| Saad | 2017 | <https://doi.org/10.1016/j.nicl.2017.05.016> | M | M | no |  |
| Anderson | 2014 | <https://doi.org/10.1016/j.neuroimage.2013.12.015> | M | yes | yes | site, handedness |
| Svatkova | 2016 | <https://doi.org/10.1002/hbm.23243> | S | no | S | Total brain volume |
| Ercan | 2016 | https://doi.org/10.1007/s00787-015-0731-3 | yes | yes | no |  |
| Lei | 2014 | https://doi.org/10.1038/srep06875 | M | M | no |  |
| Solanto | 2009 | <https://doi.org/10.1111/j.1552-6569.2008.00289.x> | M | M | M |  |
| Hong | 2014 | <https://doi.org/10.1016/j.biopsych.2013.12.013> | yes | yes | yes | Clinical characteristics (omission, commission errors), paternal education |
| Orinstein | 2014 | <https://doi.org/10.1016/j.pscychresns.2014.05.012> | M | M | no | Ethnicity |
| Ahn | 2015 | 10.5705/ss.2013.232w | no | no | no |  |
| Dos Santos Siqueira | 2014 | <https://doi.org/10.1155/2014/380531> | no | no | no |  |
| Fair | 2013 | <https://doi.org/10.3389/fnsys.2012.00080> | M | yes | yes | Site, movement |
| Pikusa | 2015 | <https://doi.org/10.1515/psicl-2015-0006> | S | S | no | Motion parameters |
| Sanefuji | 2016 | <https://doi.org/10.1016/j.cortex.2016.06.005> | yes | yes | yes | Head motion, site, motion |

|  | **ABCD Study**  **(N =7,722) ͣ** |  | **Generation R**  **(N = 2,531) ᵇ** |  |
| --- | --- | --- | --- | --- |
|  | **Level** | **Values** | **Level** | **Values** |
| ADHD symptoms (median, [IQR]) |  | 2.0 [0.0, 5.0] |  | 2.0 [1.0, 5.0] |
| Age at MRI assessment, years (mean ± SD) |  | 9.9 ± 0.6 |  | 10.1 ± 0.6 |
| Sex (N (%)) | Female | 3623 (46.9) | Female | 1241 (49.0) |
|  | Male | 4099 (53.1) | Male | 1290 (51.0) |
| Ethnicity (N (%)) | White | 3837 (49.7) | Western | 1842 (72.8) |
|  | Black | 1150 (14.9) | Non-western | 665 (26.3) |
|  | Hispanic | 1752 (22.7) |  |  |
|  | Asian | 182 (2.4) |  |  |
|  | Other | 792 (10.3) |  |  |
| Household income (N (%)) | < 50k | 2233 (28.9) | Low | 373 (14.7) |
|  | 50k – 100k | 2003 (25.9) | Medium | 580 (22.9) |
|  | > 100k | 2797 (36.2) | High | 1275 (50.4) |
| Highest parental education (N (%)) | No diploma | 412 (5.3) | Low | 193 (8.3) |
|  | HS diploma / GED | 778 (10.1) | Medium | 650 (27.9) |
|  | Some college | 2046 (26.5) | High | 1484 (63.8) |
|  | Bachelor | 1850 (24.0) |  |  |
|  | Post graduate | 2627 (34.0) |  |  |
|  | **Level** | **Values** | **Level** | **Values** |
| Maternal age at childbirth, years (mean ± SD) |  | 29.2 ± 6.3 |  | 31.4 ± 4.7 |
| Maternal psychopathology (median [IQR]) |  | 16 [8.0, 29.0] |  | 0.1 [0.1, 0.3] |
| Maternal smoking during pregnancy (N (%)) | No | 6485 (84.0) | No | 1784 (70.5) |
|  | Yes | 1034 (13.4) | Yes | 466 (18.4) |
|  | Don’t know | 201 (2.6) |  |  |
| Maternal cannabis during pregnancy (N (%)) | No | 7017 (90.9) | No | 1991 (78.6) |
|  | Yes | 470 (6.1) | Yes | 46 (1.8) |
|  | Don’t know | 233 (3.0) |  |  |
| IQ (mean ± SD) |  | 9.9 ± 3.0 |  | 103.9 ± 14.7 |
