# Supplementary figures and images for: Attention-deficit hyperactivity disorder symptoms and brain morphology: Examining confounding bias
Source: eLife journal article supplement (doi:10.7554/elife.78002), 2022-11-07

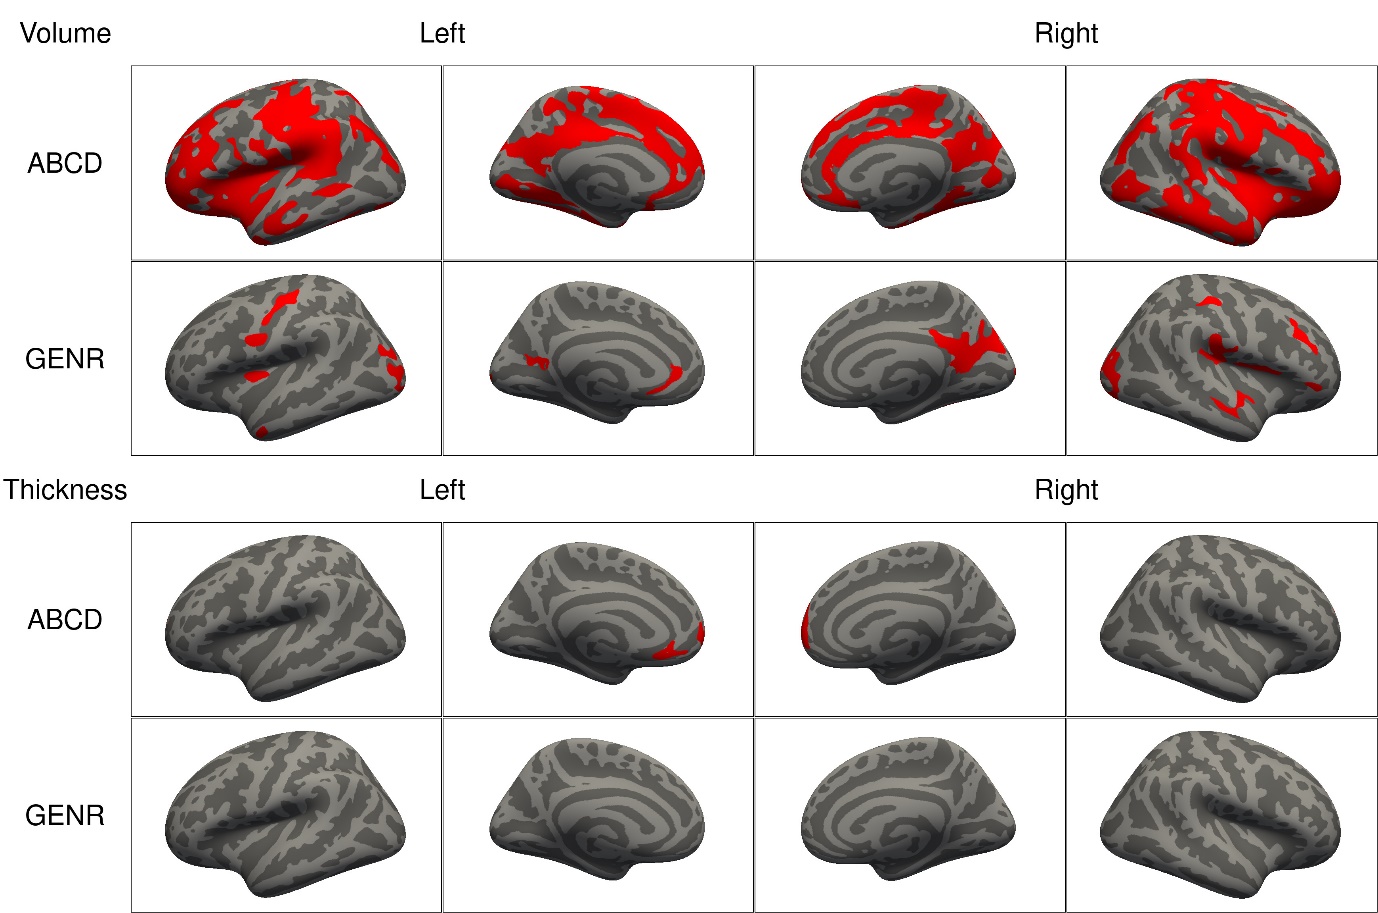

Supplement: supp [file elife_poa_e78002_Figure_1_figure_supplement_1.docx]

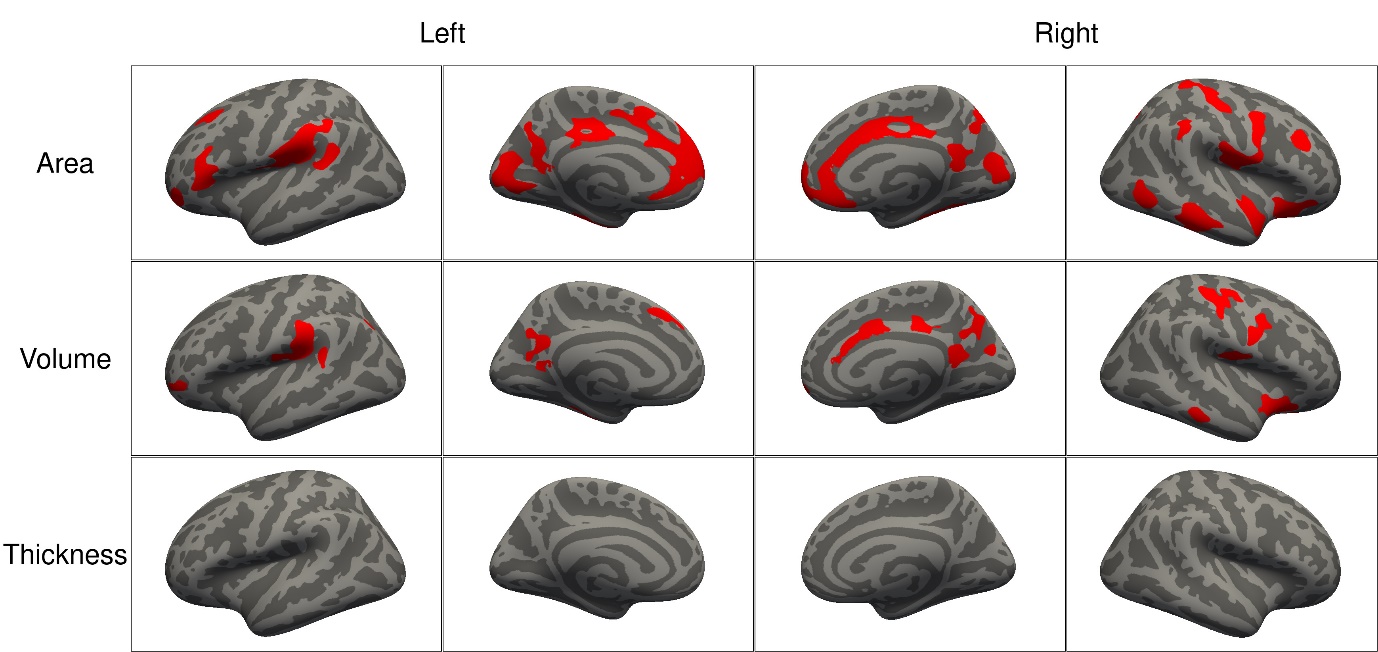

Supplement: supp [file elife_poa_e78002_Figure_1_figure_supplement_2.docx]

**
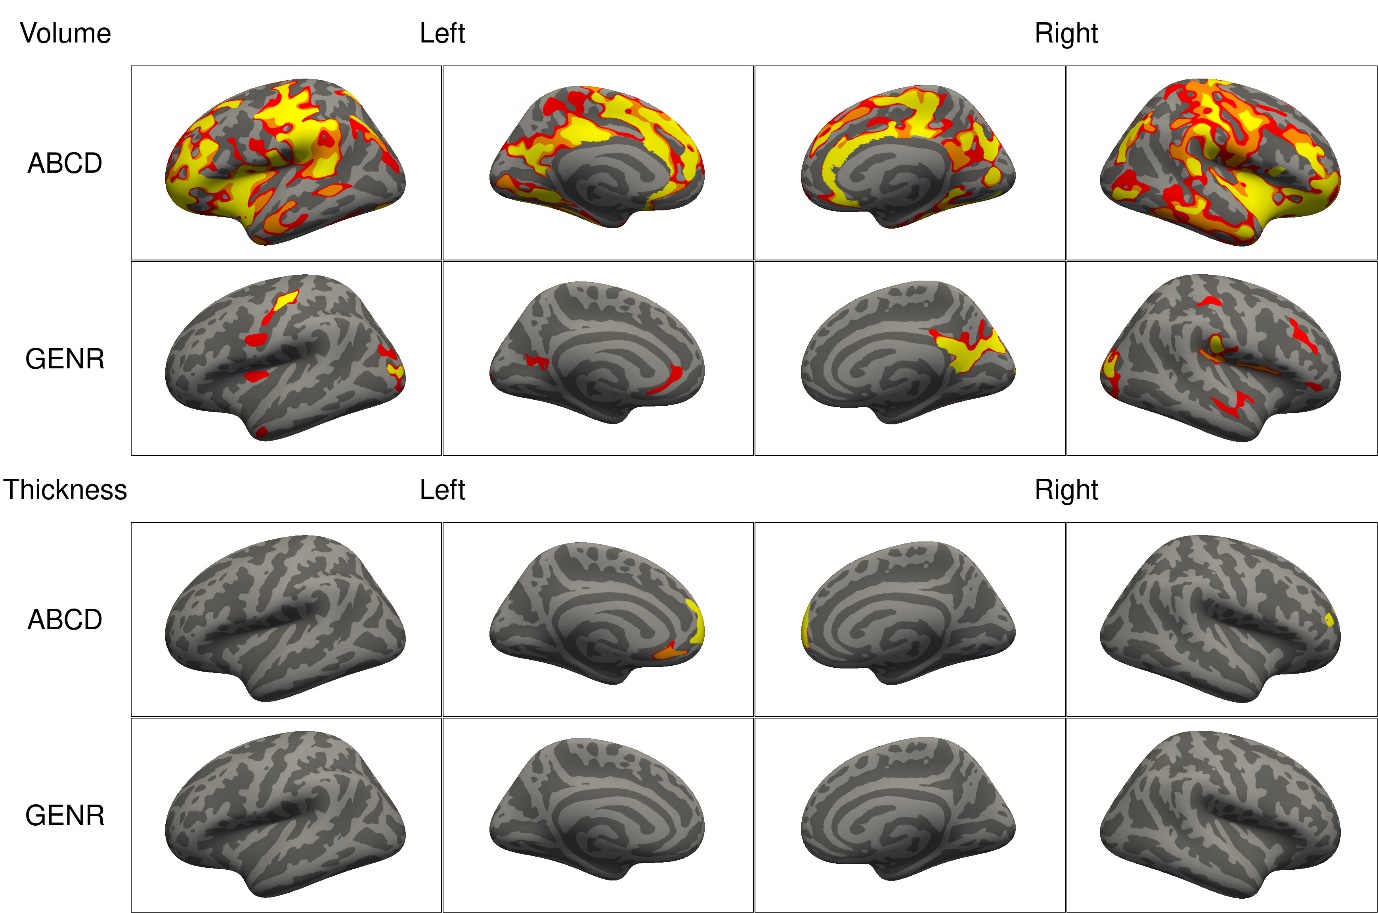
**

Supplement: supp [file elife_poa_e78002_Figure_3_figure_supplement_1.docx]

**
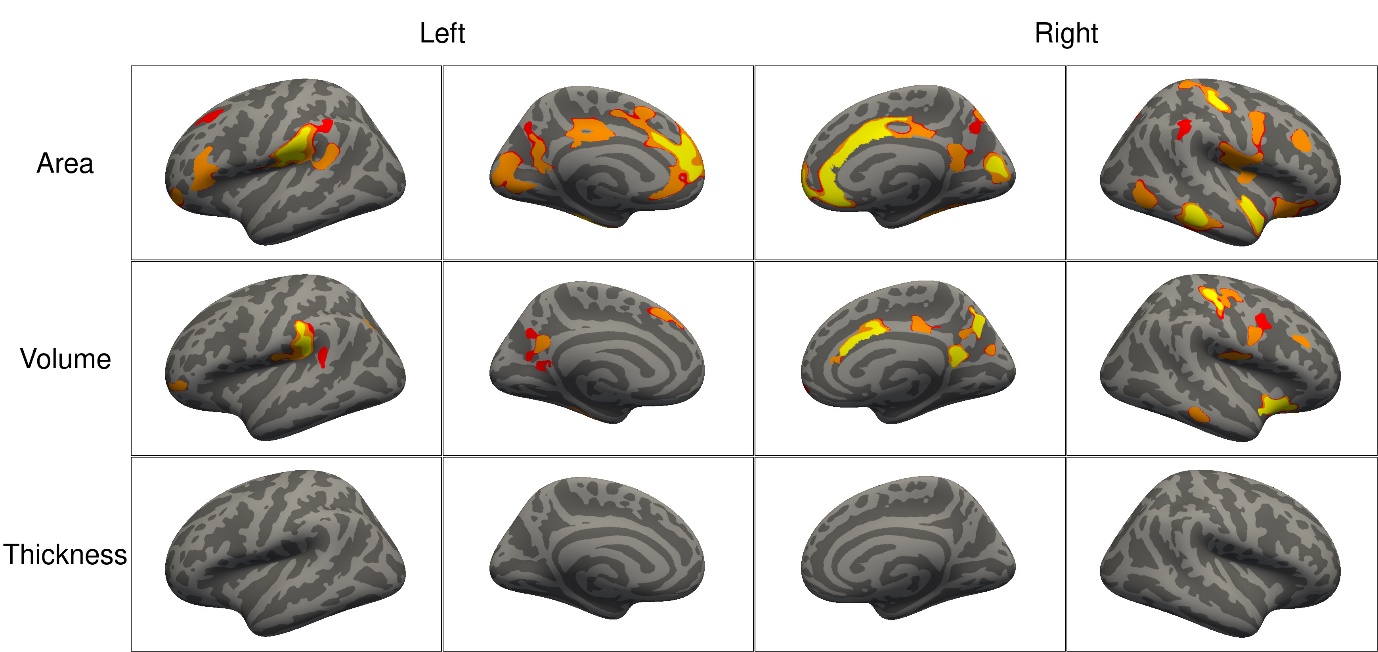
**

Supplement: supp [file elife_poa_e78002_Figure_3_figure_supplement_2.docx]

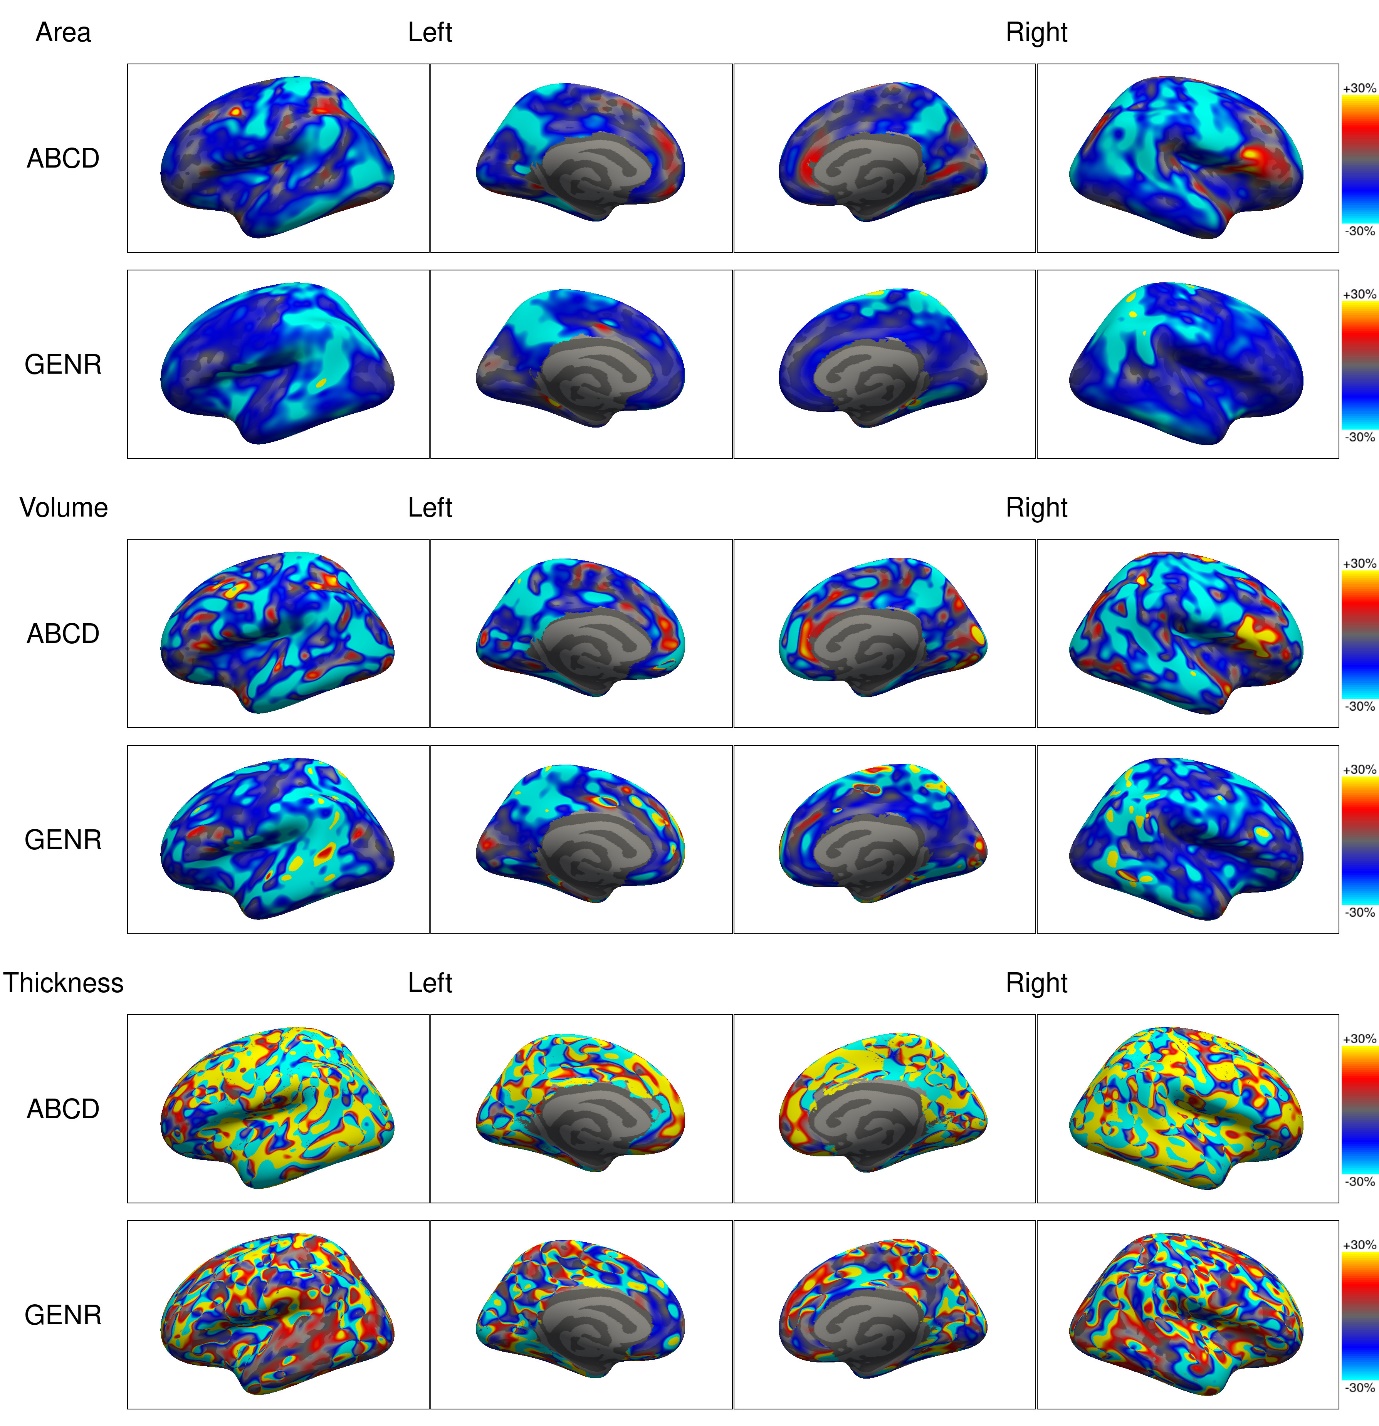

Supplement: supp [file elife_poa_e78002_Figure_4_figure_supplement_1.docx]

**
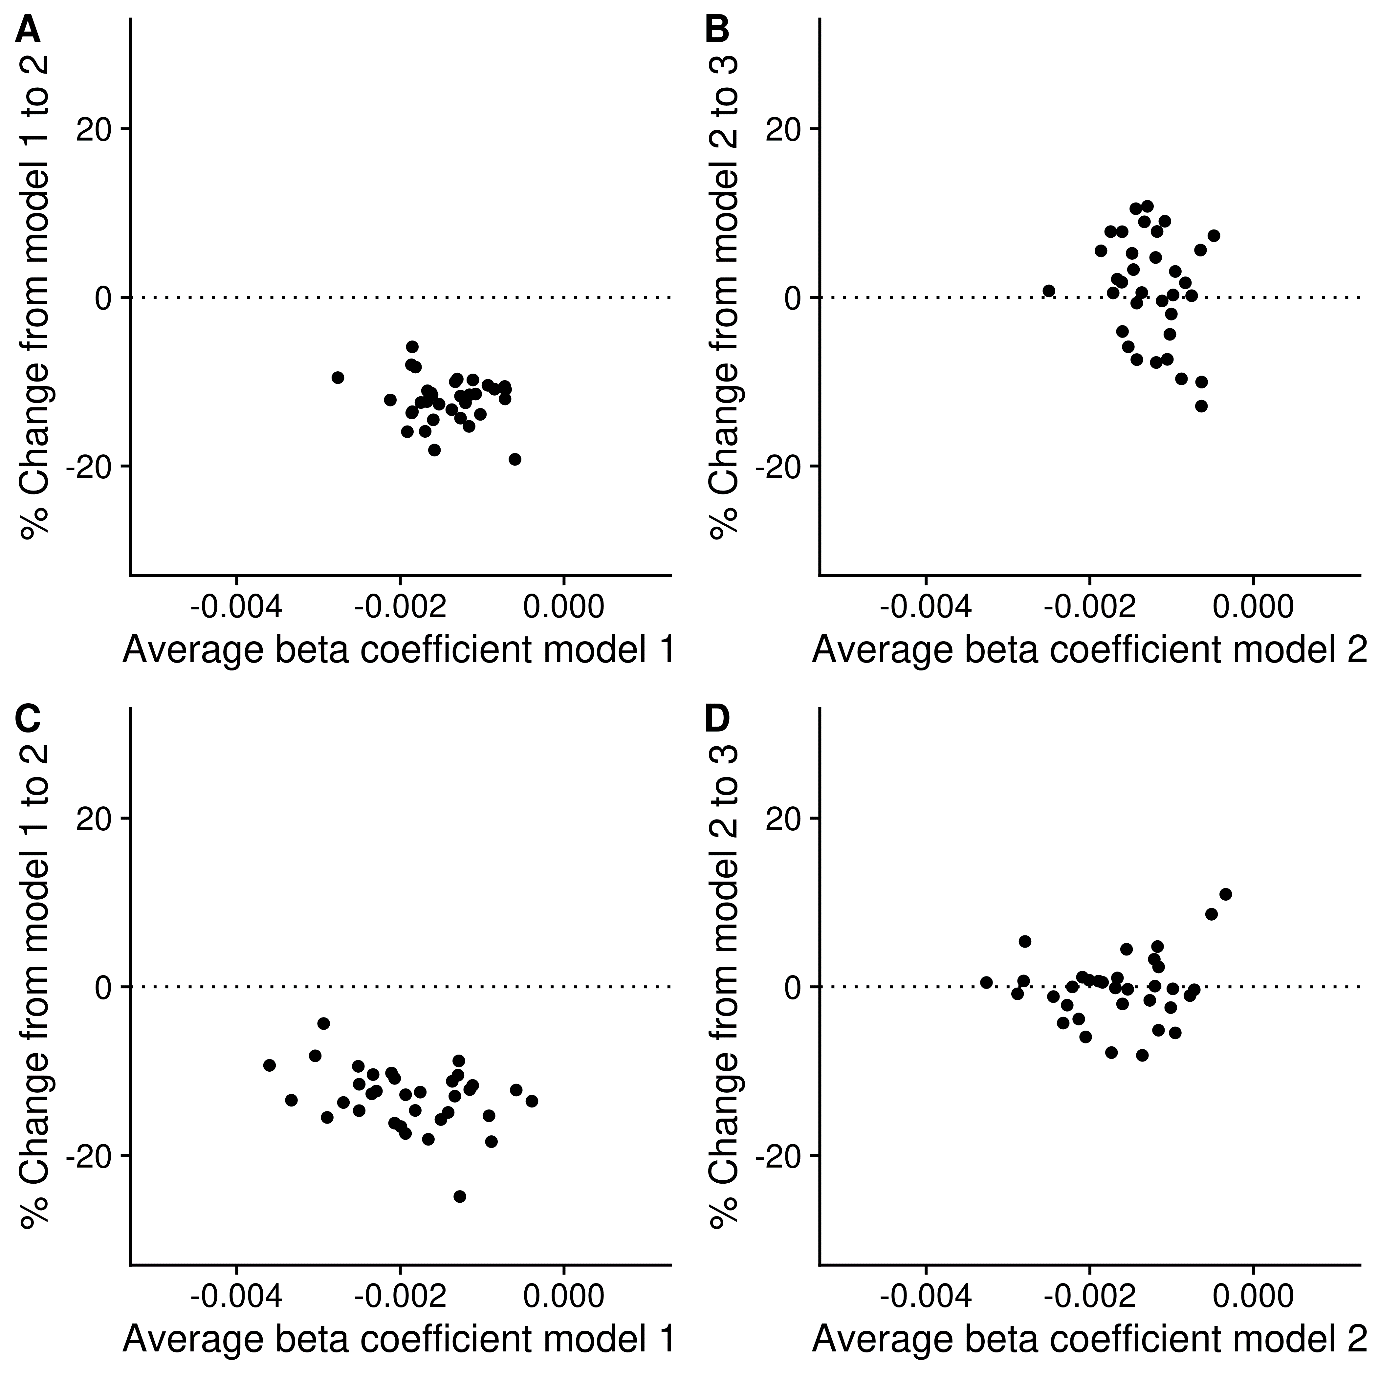
**

Supplement: supp [file elife_poa_e78002_Figure_4_figure_supplement_2.docx]

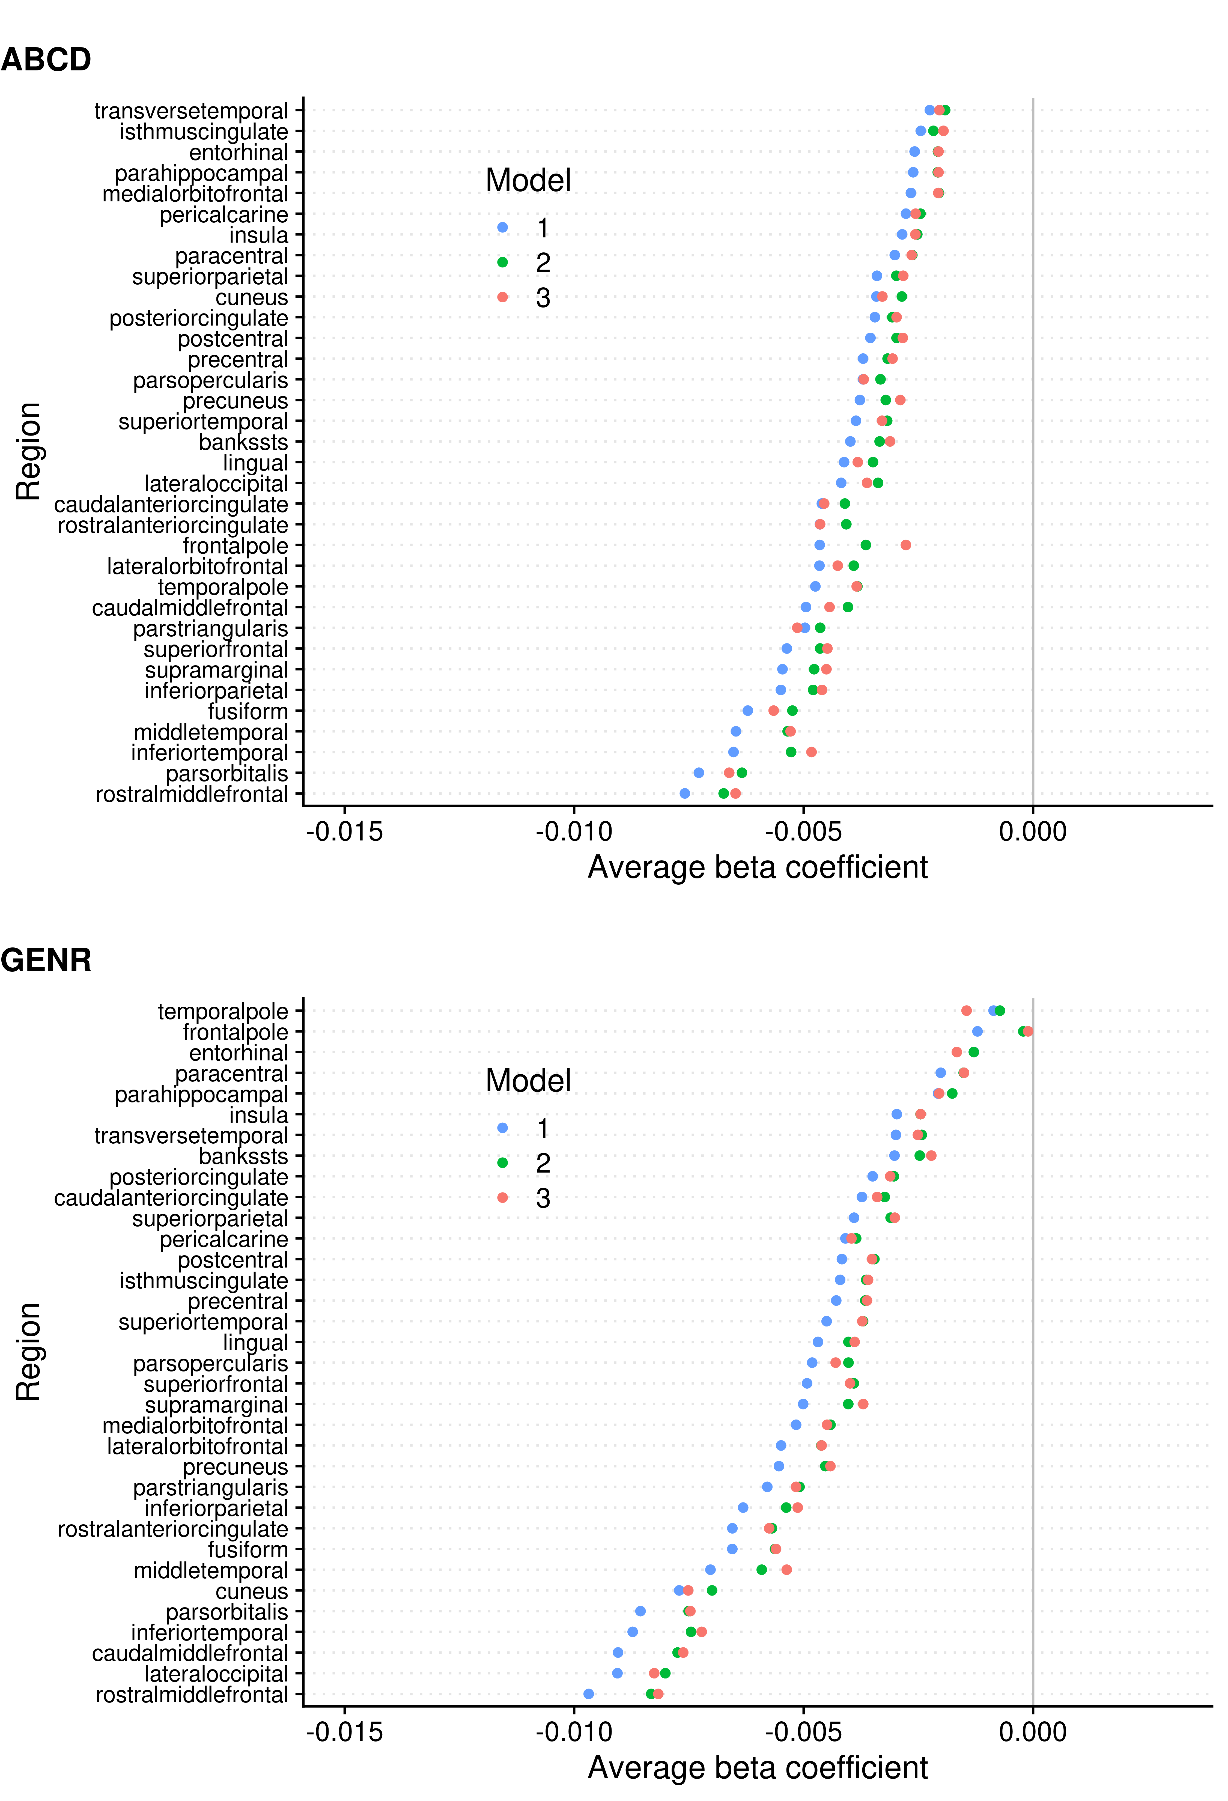

Supplement: supp [file elife_poa_e78002_Figure_4_figure_supplement_3.docx]

**
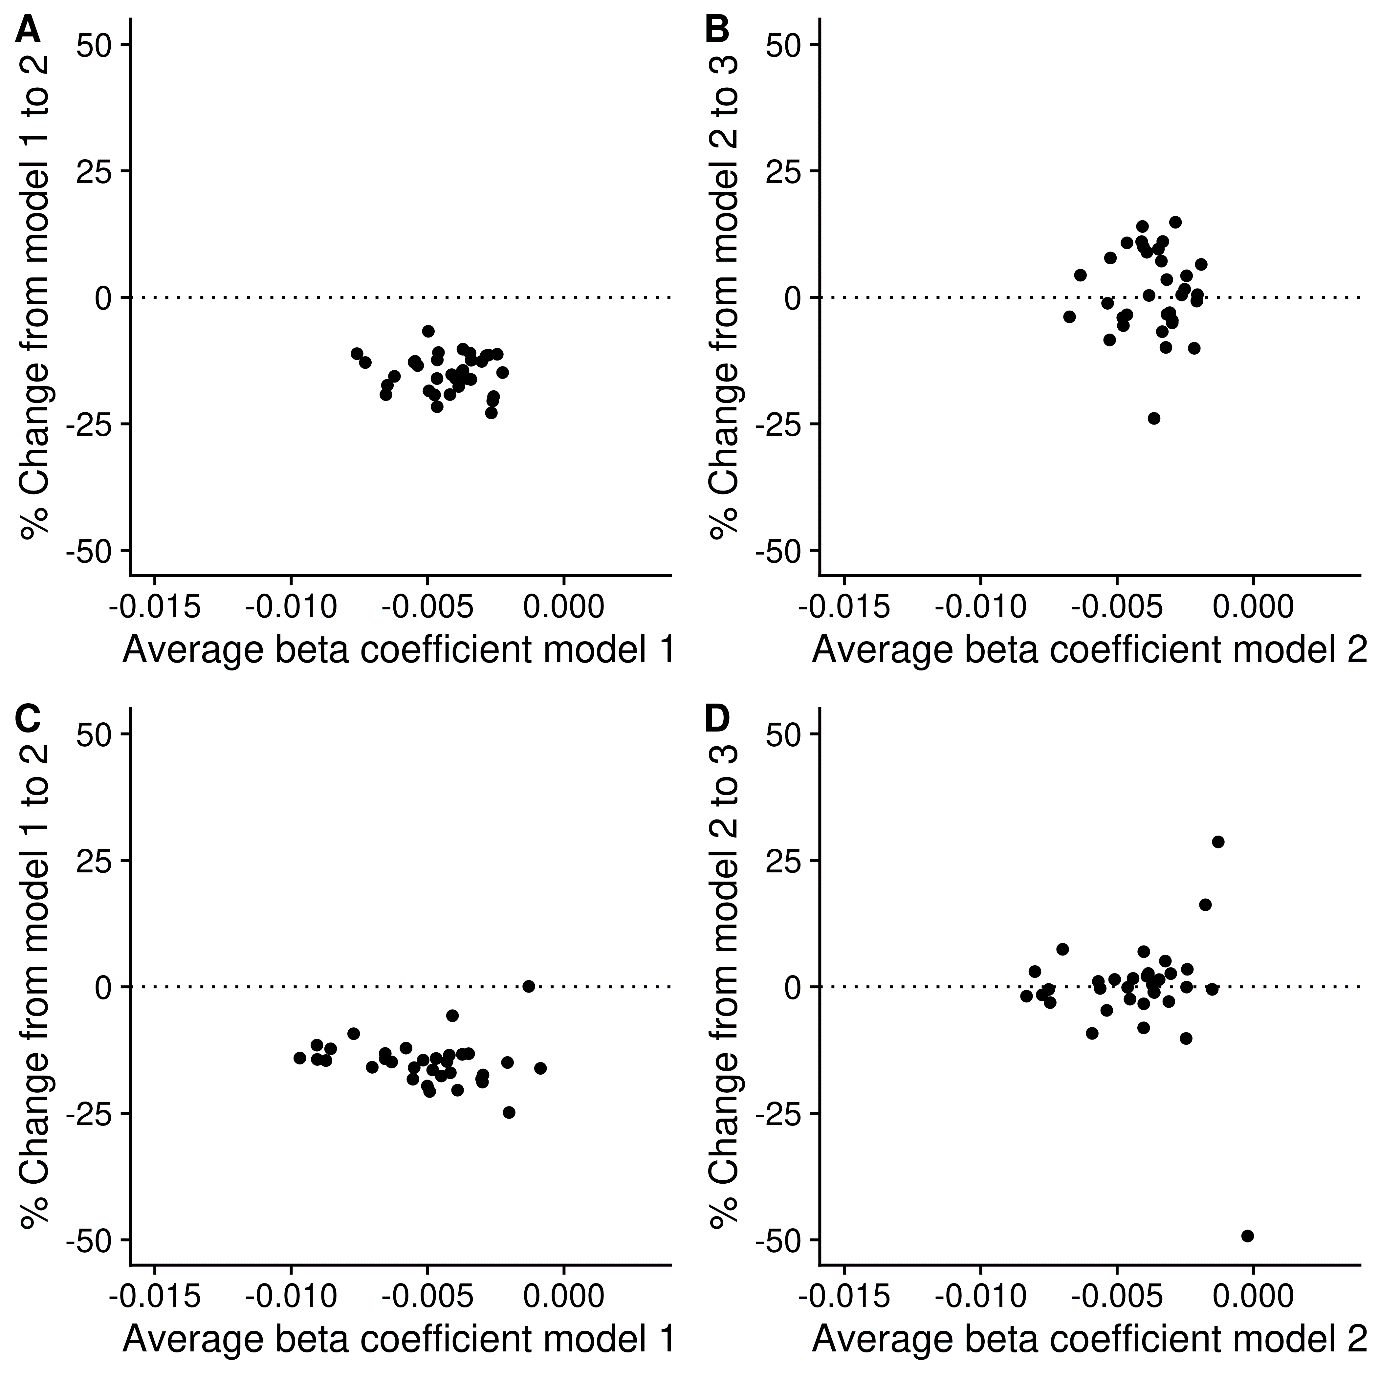
**

Supplement: supp [file elife_poa_e78002_Figure_4_figure_supplement_4.docx]

**
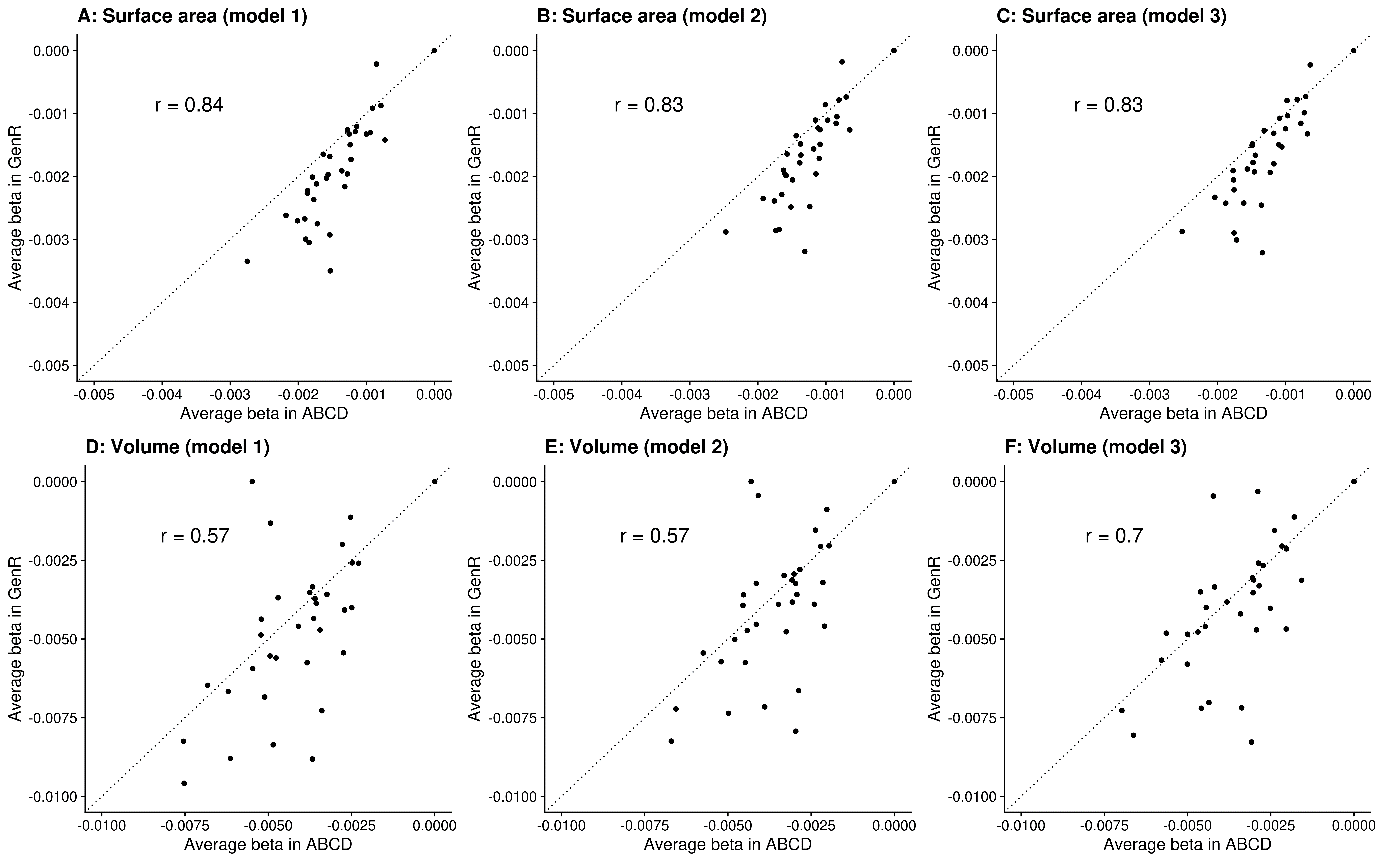
**

Supplement: supp [file elife_poa_e78002_Figure_4_figure_supplement_5.docx]

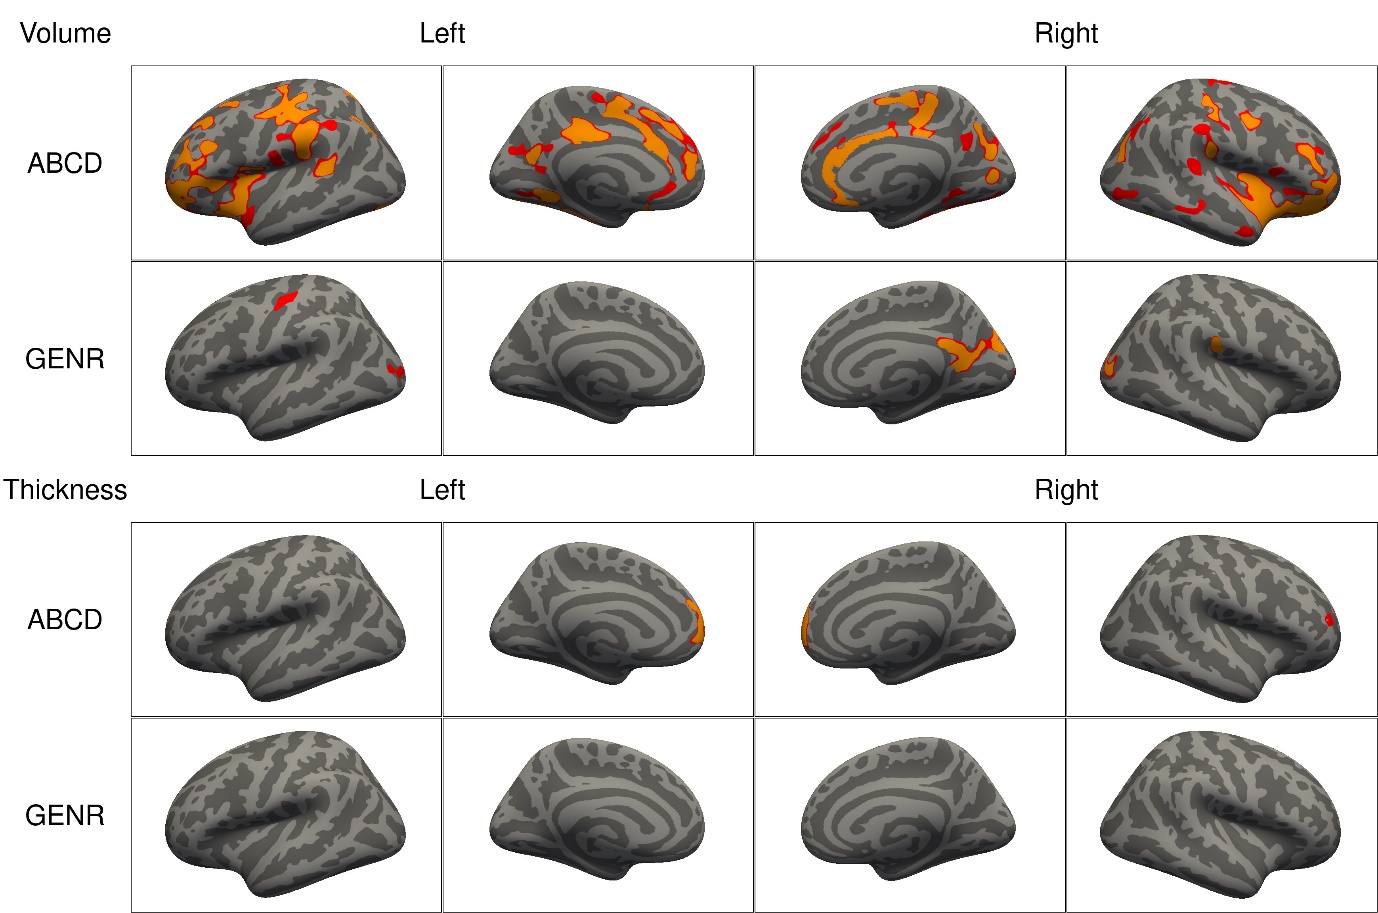

Supplement: supp [file elife_poa_e78002_Figure_6_figure_supplement_1.docx]

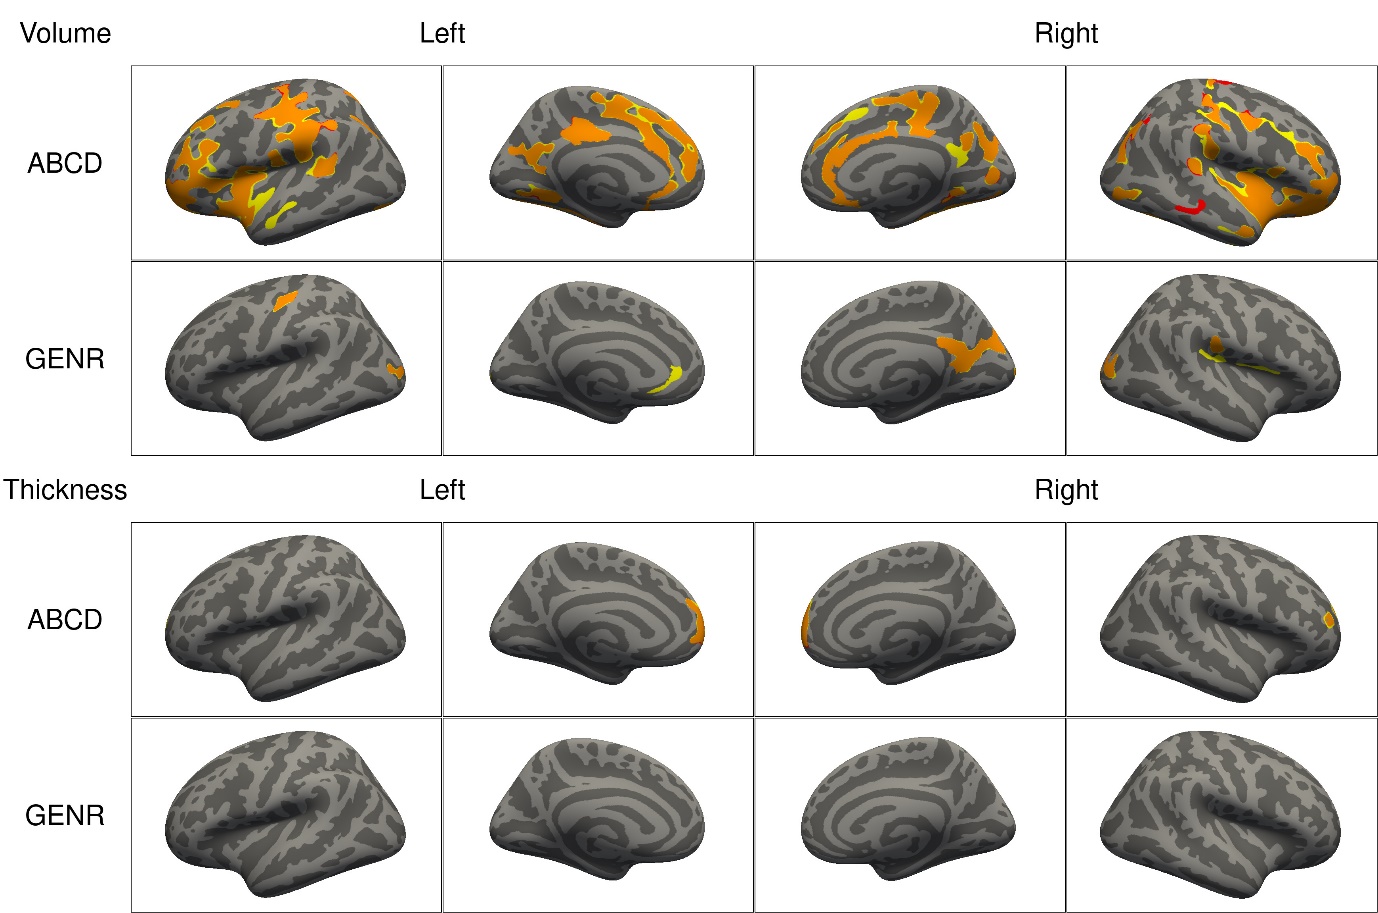

Supplement: supp [file elife_poa_e78002_Figure_8_figure_supplement_1.docx]
